# Supplementary material
Source: publisher site journal article supplement (https://www.spandidos-publications.com/2215/downloadSupplementary)

Figure S1. The assessment of KYDS mouse model. (A) Whole body weight and (B) rectal temperature were measured for 7 days, to monitor establishment of the KYDS mouse model. (C) Spontaneous activity and (D) swimming time were calculated in the model and normal groups. \* $P<0.05$  and \*\* $P<0.01$  vs. normal control.  $n=10$  in each group.

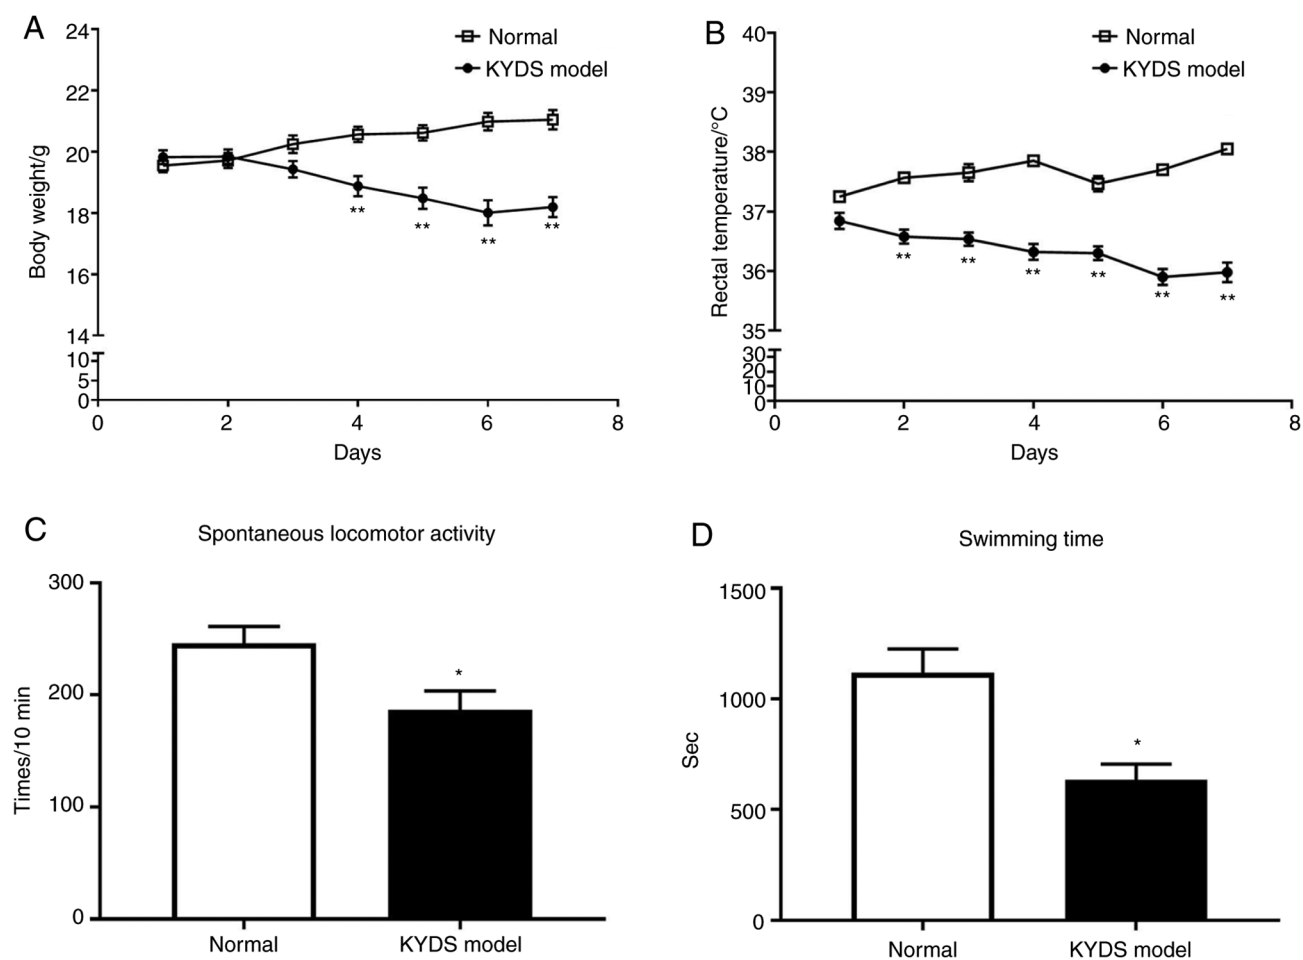

Figure S2. The assessment of KYDS mice model with serum hormones. Serum (A) estradiol, (B) progesterone, (C) T3, and (D) T4 levels were measured by xMAP® technology in a flow cytometry-based Luminex 200 instrument. \*P<0.05 and \*\*\*P<0.001 vs. normal control. n=8-10 in each group. KYDS, Kidney-yang deficiency syndrome.

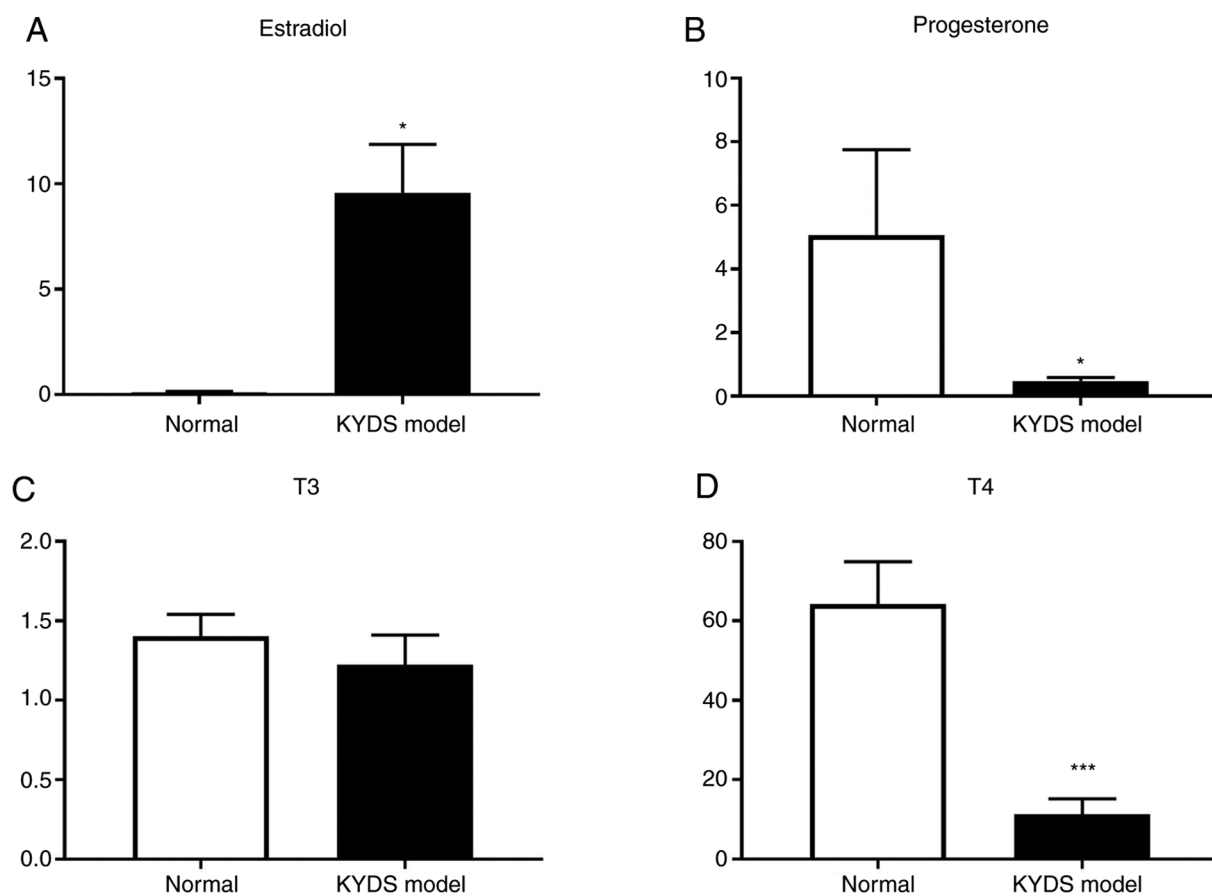

Supplement: Supplementary file 1 [file downloadSupplementary]
